43 **ABSTRACT**

44 Background: SARS-CoV-2 is believed to have emerged from an animal reservoir as a zoonotic  
45 pathogen. Over the course of the current pandemic, evidence has mounted that infected  
46 humans can transmit the virus to animals including household pets, however the frequency of  
47 and risk factors for this transmission remain unclear. We carried out a community-based study  
48 of pets in households with one or more confirmed SARS-CoV-2 case among the human  
49 residents, and report here on interim findings from sampling of dogs.

50 Methods: Data collection included a survey of human and animal demographic and clinical  
51 variables, features of their shared environment, and human-animal contact; blood collection  
52 from animals for serology for anti-SARS-CoV-2 antibodies; and nasopharyngeal sampling for  
53 PCR testing for SARS-CoV-2.

54 Results: Sampling consisted of 67 dogs from 46 households. Nasopharyngeal PCR testing results  
55 were available for 58 dogs, and serological testing results were available for 51. Clinical signs  
56 consistent with COVID-19 were reported in 14 dogs (23.7%, 95% CI 0.13, 0.35), and SARS-CoV-2  
57 antibody testing using viral receptor binding domain ELISA was positive in 22 dogs (43.1%, 95%  
58 CI 0.30, 0.57). All PCR tests of nasopharyngeal swabs were negative. Survey respondents  
59 commonly reported close human-animal contact, and the majority of households were aware  
60 of and adopted measures to mitigate human-to-animal transmission of SARS-CoV-2 following  
61 diagnosis. While no statistically significant associations were detected between human-animal  
62 contact variables and either seropositivity or COVID-19 like illness in dogs, positive trends were  
63 found for sharing beds with humans and the number of SARS-CoV-2 positive humans in the  
64 corresponding household. Reported measures taken by the household to mitigate transmission

65 showed a protective trend, and COVID-19 like illness in a dog was positively associated with  
66 seropositivity in that dog.

67 Discussion: These data indicate that human-to-animal transmission of SARS-CoV-2 in  
68 households is common, in a study population characterized by close human-animal contact.  
69 They also indicate that infected pets often manifest signs of COVID-like illness. While  
70 nasopharyngeal sampling of dogs in this study has not to date demonstrated positive PCR  
71 results, this could be due to delays in sampling. Household members reported taking  
72 precautions to protect pets from SARS-CoV-2 infection, indicating an opportunity for further  
73 measures to reduce transmission of SARS-CoV-2 between people and animals sharing  
74 households.

75 **Keywords:** SARS-CoV-2; COVID-19; zoonoses; One Health; anthroozoonoses; household  
76 transmission

77 **Abbreviations:** DAG: directed acyclic graph

78

## 79 **BACKGROUND**

80 Coronaviruses occur in multiple mammalian species, and SARS-CoV-2 virus, the etiological  
81 agent of COVID-19 infection, is thought to have jumped to humans from a mammalian source  
82 [1]. While currently the virus is spreading person to person, the ACE2 receptor involved in SARS-  
83 CoV-2 transmission is present in multiple species and there are numerous anecdotal reports of  
84 companion animals becoming infected, including dogs and cats. At the date of this writing, 76  
85 cats and 51 dogs in the USA have been reported by USDA-APHIS to have confirmed SARS-CoV-2  
86 infection based on PCR or antibody testing. Workplace transmission of SARS-CoV-2 between  
87 humans and animals has also been documented, including in zoos (felids and non-human  
88 primates) and on mink farms [2,3]. This is consistent with previous reports of SARS-CoV-1  
89 infecting cats and ferrets, as well as laboratory studies demonstrating experimental SARS-CoV-  
90 2 infection of non-human primates, ferrets, hamsters, and rabbits [4]. Less is known, however,  
91 about the frequency of and risk factors for SARS-CoV-2 transmission between humans and  
92 companion animals in a household setting. Furthermore, the natural history of COVID-19  
93 infection in pets is poorly understood.

94         Given the close contact many people have with their pets and the intimate nature of  
95 their shared environment, in particular during periods of quarantine or isolation, it is important  
96 to better understand the role of companion animals in community infection patterns, including  
97 whether such transmission contributes to virus evolution and emergence of novel strains. In  
98 light of evidence from mink farms that animal-origin variants may contain spike mutations and  
99 other changes that could affect clinical features of infection[5,6], ongoing monitoring of SARS-

100 CoV-2 transmission between humans and animals in household and other human-animal  
101 contact settings remains critical.

102 We report interim findings from the COVID and Pets Study (CAPS), a cross-sectional  
103 community-based study of animals in households of persons with documented COVID-19  
104 infection conducted from 2020 to 2021 in Washington and Idaho. The goal of the study is to  
105 describe the frequency of transmission between humans and animals within a household, and  
106 to determine human, animal, and environmental risk factors for that transmission, in a One  
107 Health framework.

108

## 109 **METHODS**

110 The COHERE [7] and STROBE [8] statements were used to guide reporting of the findings and  
111 the preparation of this manuscript.

### 112 **Study population**

113 We recruited households for this study, defining a household as one or more persons ages 18  
114 or older, co-housing, or co-sheltering in the case of unhoused individuals, with at least one pet  
115 that does not live solely outdoors. Pets were defined as dogs, cats, ferrets, and hamsters based  
116 on prior research documenting experimental COVID-19 infection in these species [9,10].

117 We conducted this study in King, Snohomish, Yakima, Whitman, Pierce, Spokane, and  
118 Benton counties in Washington, and Latah County in Idaho. Enrollment began in April 2020, and  
119 continues at the time of publication.

### 120 **Study design**

121 CAPS is a cross-sectional study with individual- and household-level data collection, with a  
122 longitudinal component for households with PCR positive pets. Study participation involved  
123 two components, detailed below: an online survey followed by animal sampling.

#### 124 **Study team**

125 Our study team was comprised of veterinarians, microbiologists, physicians, epidemiologists,  
126 environmental health experts, and medical anthropologists from the University of Washington's  
127 Center for One Health Research, and Washington State University's College of Veterinary  
128 Medicine, Washington Animal Disease Diagnostic Laboratory, and Paul G. Allen School for  
129 Global Health.

#### 130 **Recruitment and eligibility**

131 Households were recruited through partnerships with other COVID-19 clinical trials, social  
132 media, word of mouth and through community partners. Individuals were screened for  
133 eligibility using the UW Research Electronic Data Capture (REDCap) system [11], a HIPAA-  
134 compliant web tool for clinical research, with criteria including county of residence, pet  
135 ownership, and one or more household member with confirmed SARS-CoV-2 infection.

136 During eligibility screening participants were asked to confirm that any animals to be  
137 sampled were up to date on their rabies vaccination, and were suitable for sampling based on  
138 knowledge of that pet's behavior when receiving veterinary care. Animals with known fearful  
139 and/or aggressive behavior in response to restraint were excluded from sampling, however the  
140 corresponding household was not excluded from completing the REDCap survey, nor from  
141 animal sampling if other animals residing in the household were amenable to sampling.

#### 142 **Ethical approvals**

143 This study and its protocols received ethical approval from the University of Washington’s  
144 Institutional Review Board STUDY00010585) and Office of Animal Welfare (PROTO201600308:  
145 4355-01). Informed consent was obtained from human subjects via REDCap, or over the phone  
146 with the study coordinator if preferred by the participant, after the nature and possible  
147 consequences of study involvement had been explained. Once eligibility was confirmed and  
148 consent was obtained, individuals then completed the online survey.

### 149 **Survey**

150 A comprehensive survey was completed by a person living in the same household as the pet(s)  
151 prior to scheduling of the sampling visit. Surveys could be completed by the study participant  
152 online using the REDCap interface, or on the phone with the study coordinator if preferred.  
153 Human items included symptoms, timeline, and severity of COVID-19 infection and illness for  
154 any affected household members (including individuals who did not have confirmatory testing),  
155 and comorbidities. Animal items were stratified on individual animal, and included veterinary  
156 clinical variables, history of COVID-like illness, and contact between individual animals and  
157 individual members of the household including questions pertaining to co-sleeping, kissing, and  
158 sharing of glassware and other food containers (“utensils”). Environmental items included type  
159 and size of home, type of flooring (carpet, wood, etc.), and availability of outdoor space for pets  
160 to roam.

161 A second brief survey was completed verbally at the time of sampling to collect data on  
162 changes in the clinical status of human and animal household members since the REDCap  
163 survey was completed, including new hospitalizations, symptoms, or COVID-19 diagnoses.

164 Confirmation of COVID-19 positive status and testing date was also performed at this time  
165 through review of test results by the sampling team.

## 166 **Animal sampling**

167 Sampling was performed by a team of two study personnel, one veterinarian and either a  
168 second veterinarian or an assistant trained in ethical animal restraint. In most cases sampling  
169 was conducted at the participant's home, however several animals were tested at veterinary  
170 clinics. No chemical restraint was used, nor muzzles due to biosafety concerns. When possible,  
171 sampling was performed outdoors to minimize the study team's exposure, however the same  
172 PPE and health and safety protocols were adhered to regardless of whether sampling was  
173 indoors or outdoors.

174       Species-appropriate restraint was employed using standard techniques to allow for  
175 venipuncture and collection of 3 mL of blood into a labeled serum separator tube. Following  
176 venipuncture, swab samples were collected from both rostral nares/nasal passage and the  
177 caudal oropharynx, and placed into one Primestore MTM tube [Longhorn Vaccines and  
178 Diagnostics]. If an animal started to exhibit severe signs of stress and/or aggression during  
179 restraint, attempts to sample were halted to maintain human and animal safety. All participants  
180 received educational information about measures to mitigate household COVID-19  
181 transmission from the field team.

182       Swab and serum samples were transported on ice within 24 hours to the Washington  
183 Animal Disease Diagnostic Laboratory (WADDL) for PCR and antibody testing.

## 184 **Testing**

### 185 SARS-CoV-2 RT-PCR



186 Total nucleic acid was extracted from nasopharyngeal swab samples in 1mL of PrimeStore MTM  
187 [LongHorn Diagnostics] using MagMAX™-96 Viral RNA Isolation Kit [ThermoFisher, Waltham,  
188 MA 02451], per the manufacturer's instructions. Reverse transcriptase (RT) real-time PCR to  
189 the SARS-CoV-2 RNA-dependent RNA polymerase gene (RDRp) was performed as previously  
190 described using SARS-CoV-2 primers RdRp\_SARSr-F2 5'-GTGARATGGTCATGTGTGGCGG-3' and  
191 COVID-410R 5'-CCAACATTTTGCTTCAGACATAAAAAC-3' [12], using TaqMan Fast Virus 1-Step  
192 Master Mix Kit [Thermo Fisher]. RNA amplification was done using ABI 7500 Fast  
193 (ThermoFisher, Waltham, MA 02451). Controls included positive extraction control  
194 (RdRp\_GATTAGCTAATGAGTGTGCTCAAGTATTGAGTGAAATGGTCATGTGTGGCGGTTCACTATATGT  
195 TAAACCAGGTGGAACCTCATCAGGAGATGCCACAAGTCTTATGCTAATAGTGTTTTAAACATTTGTCAA  
196 GCTGTCACGGCCAATGTTAATGCACTTTTATCTACTGATGGTAACAAAATTGCCGATAAGTATGTCCGCA  
197 ATTTAC), negative extraction control (PCR water), positive amplification control (SARS-CoV-2  
198 whole genome RNA), and negative amplification control (No template control). Graphs and  
199 tabular Ct results were reviewed on the ABI 7500 FAST program. Unknown samples were  
200 considered positive if they rose above the threshold by cycle 45. All others were considered  
201 negative.

#### 202 SARS-CoV-2 Spike Protein ELISA

203 For dog antibody testing, WADDL developed a SARS-CoV-2 ELISA assay using recombinant SARS-  
204 CoV-2 Spike Receptor Binding Domain protein as antigen (S-RBD). The recombinant RBD was  
205 obtained from the UW Center for Emerging and Reemerging Infectious Disease (CERID)  
206 laboratory of Dr. Wesley Van Voorhis through an institutional Material Transfer Agreement.  
207 WADDL used an in-house standard operating procedure for indirect ELISA of SARS-CoV-2 in 96-

208 well format based up a previous publication in humans. The major components of the assay  
209 included: 1) rS-RBD coating of plates as target antigen (2ug/ml in Sigma Carbonate-Bicarbonate  
210 Buffer); 2) 1:100 dilution of test sera (diluted in ChronBlock ELISA Buffer-Chondrex Inc.); 3) anti  
211 dog IgG-HRP as linker (Southern BioTech goat anti-canine IgG) and 4) Sigma (TMB) liquid  
212 substrate system to develop OD. Plates were blocked with ChronBlock ELISA buffer per  
213 manufacturer's instructions, washing solution consisted of PBS+0.1% Tween 20 (Sigma), and  
214 plates were read on a plate reader at 450 nM. Test samples and controls were run in triplicate.  
215 The negative controls consisted of sera from six pre-COVID dogs, archived at WADDL, run in  
216 triplicate and the mean utilized as "OD negative controls". The positive cutoff of 2.0 test  
217 OD:negative control OD equated to mean of negative controls + 3 standard deviations of the  
218 mean.

## 219 **Statistical analyses**

220 A study database was created using an anonymous identifier to store epidemiological and  
221 clinical data through REDCap. All analyses were conducted in R [13].

222 The primary aim of this study was to estimate the burden of household SARS-CoV-2  
223 transmission from humans to their pets. Secondary aims included describing the nature of  
224 human-animal contact within households, and identifying risk factors for household  
225 transmission, including human-animal contact.

## 226 Outcome

227 Animal infection with SARS-CoV-2 was defined as an animal meeting one or more of the  
228 following criteria: (1) seropositive status, (2) PCR positive status, or (3) COVID-19 like illness,  
229 defined as participant answer of "yes" to the survey question: "Since the time of COVID

230 diagnosis/symptom onset in the household, has this animal had any new issues with difficulty  
231 breathing, coughing and/or decreased interest in playing, walking, or eating?”

### 232 Descriptive statistics

233 All descriptive statistics were generated at the animal-level. Key variables included human-  
234 animal transmission, animal and human clinical variables, environmental variables, and human-  
235 animal contact variables. If there was more than one SARS-CoV-2 positive household member,  
236 the index case was defined as the person completing the survey.

### 237 Regression models

#### 238 *Outcomes*

239 Outcome was defined as an animal case of SARS-CoV-2, defined above. Separate regression  
240 models were fit for each outcome definition.

#### 241 *Exposures*

242 Household-level exposures for animal infection included residence in house versus apartment  
243 or condominium (binary), home size in square feet (continuous), and the number of confirmed  
244 SARS-CoV-2 cases (continuous).

245 Animal-level exposures for infection included bedsharing with one or more human  
246 household members (binary), sharing eating utensils with humans (binary), and SARS-CoV-2  
247 positive household members taking precautions to prevent transmission to their pets following  
248 diagnosis, including not petting or kissing the animal, staying in a different room, and having  
249 someone else feed and walk the animal (binary).

250 We also examined the association between canine seropositivity and COVID-19 like  
251 illness in the animal, and between seropositivity and time since the animal was first exposed,

252 defined as 2 days prior to the first date any household member had symptoms of COVID-19 or  
253 tested positive, whichever was earlier.

#### 254 *Confounders*

255 We identified possible confounders *a priori* using a directed acyclic graph (DAG; Figure 1). The  
256 minimum sufficient adjustment set was defined, using this DAG and DAGitty.net, separately for  
257 each exposure [14].

258 For house type, the minimum sufficient set was {SES}; for indoor-only status, the  
259 minimum sufficient set was {number of positive household members, house size, house type,  
260 precautions taken, bedsharing, and sharing eating utensils}; for house size, the minimum  
261 sufficient set was {SES, house type}; for sharing eating utensils, the minimum sufficient set was  
262 {number of positive household members, house type, house size, indoor-only status,  
263 precautions taken, and bedsharing}; for number of positive household members, the minimum  
264 sufficient set was {SES, house size}; for bedsharing, the minimum sufficient set was {number of  
265 positive household members, house size, house type, indoor-only status, precautions taken,  
266 and sharing eating utensils}; and for precautions taken, the minimum sufficient set was  
267 {number of positive household members, house size, house type, indoor-only status,  
268 bedsharing, and sharing eating utensils}.

269

270 **[Figure 1: Directed acyclic graph for human-animal SARS CoV2 transmission. Variables**

271 outlined with a square are the exposures of interest, while outcome (approximated by  
272 serostatus, PCR result, and COVID-19 like illness in separate models) is outlined with a circle.

273 HAB: human-animal bond; SES: socioeconomic status; took precautions: SARS-CoV-2 positive

274 household member(s) took precautions to prevent transmission to pet; indoor-only: animal  
275 does not go outdoors; bedshare: animal shares a bed with one or more household members.]

276

277 *Models*

278 For each exposure of interest we implemented a generalized estimating equation (GEE)  
279 approach with an exchangeable working correlation structure, household as the clustering  
280 variable, and binomial models with a logit link, using the geepack package in R [15]. For  
281 regression of serostatus on COVID-19 like illness and time since first exposure, we performed  
282 logistic regression using the glm() function in R.

283

284 **RESULTS**

285 Recruitment

286 Out of 70 households enrolled to date, 54 had completed the REDCap survey. Out of these 54  
287 households, 35 were in King County, 6 in Whitman County, 2 in Pierce County, 1 in Spokane  
288 County, 1 in Benton County (all Washington), 8 in Latah County, Idaho, and one unknown (no  
289 sample visit conducted). There were four households in which the index case's date of diagnosis  
290 was not confirmed by the study team during sampling. No unhoused households have been  
291 recruited to date. After subsetting to households containing dogs, 67 dogs from 46 households  
292 were available for analyses. The data for cats are undergoing a separate analysis, and no ferrets  
293 or hamsters have been enrolled or sampled.

294 Recruitment flow is detailed in Figure 2. The two households removed in the final stage  
295 correspond to a dog which was moved from the participant's home to a family member's home

296 immediately after the onset of the participant's COVID-19 symptoms. That family member  
297 subsequently tested positive, thus the dog and corresponding households were removed from  
298 analyses as it was difficult to determine which household should be assigned to this dog for  
299 analysis. This dog was seropositive.

300 Sample collection is detailed in Figure 3. Out of 67 dogs corresponding to households  
301 with completed surveys, two belong to one household which had not yet been sampled, and a  
302 third belongs to a household which was unable to be sampled. Six dogs belonged to households  
303 in which other animals were sampled but these dogs were judged unsafe to be sampled for PCR  
304 or serology, while an additional seven dogs were judged safe to restrain for swab samples but  
305 not for serum collection.

306

307 **[Figure 2: Flowchart depicting study recruitment.** Two households were removed at the final  
308 step as the corresponding dog was moved, immediately after onset of the resident's illness,  
309 from the household of residence to a family member's household.]

310

311 **[Figure 3: Flowchart depicting serological and PCR sampling.** Out of 67 dogs corresponding to  
312 5 households with completed surveys, PCR testing is complete for 58 dogs, and serological  
313 testing is complete for 51 dogs. The remaining dogs were not sampled due to safety concerns.]

314

### 315 Descriptive statistics

316 Descriptive statistics are presented in Table 1; note the unit of analysis in this table is a dog.

317 PCR results were available for 58 dogs and serology results were available for 51 dogs. Of these,

318 22 (43.1%, 95% CI 0.30, 0.57) of dogs were seropositive and 14 (23.7%, 95% CI 0.13, 0.35) had  
319 COVID-19 like illness reported. All dogs in the study were SARS-CoV-2 PCR negative from  
320 nasopharyngeal swab samples. There were 6 households with more than one seropositive dog:  
321 5 households with two dogs each who were both seropositive, and 1 household with 5 dogs,  
322 two of whom were seropositive.

323 Nearly one-third of dogs engaged in activities outside of the household during periods of  
324 isolation or quarantine, 42 (63%) resided in households whose residents reported awareness of  
325 CDC guidelines to prevent human-animal transmission of SARS-CoV-2, and 33 (51%) resided in  
326 households which reported taking precautions to prevent such transmission to household  
327 pet(s) following diagnosis. With regards to human COVID-19 illness in household residents, only  
328 one dog resided in a household in which the case was hospitalized, however 28% resided in  
329 households in which the case had pre-existing conditions. Nearly all dogs had access to yards or  
330 gardens (85%) and were allowed on furniture (89%), and the majority were kissed by (69%) and  
331 shared beds with (72%) human household members. Almost all dogs' eating utensils were  
332 washed in the kitchen (95%).

---

333 **[Table 1: Descriptive statistics for 67 dogs corresponding to 46 households. \*mean (standard**  
334 **deviation). <sup>a</sup>Activity defined as going to a veterinary clinic or groomer, being walked off-leash,**  
335 **or visiting an off-leash park, dog park, kennel, or daycare facility. <sup>b</sup>Precautions to prevent**  
336 **human-animal SARS-CoV-2 transmission following diagnosis: not petting or kissing the animal,**  
337 **staying in a different room, and having someone else feed and walk the animal. <sup>c</sup>Guidelines to**  
338 **prevent human-animal SARS-CoV-2 transmission. <sup>d</sup>First diagnosis: earliest SARS-CoV-2 diagnosis**

339 in the household; final diagnosis: last SARS-CoV-2 diagnosis in the household. <sup>e</sup>Preexisting  
340 conditions: diabetes, kidney disease, heart disease, hypertension, immunosuppression.

341 [Household members who had COVID-19 symptoms but did not get tested.]

342

### 343 Regression models

344 Results of regression models are presented in Table 2 as prevalence odds ratios, reflecting the  
345 cross-sectional design of this study. With the exception of house size, which was adjusted for  
346 house type as the minimum sufficient adjustment set was very small for this exposure,  
347 confounders were not adjusted for due to concerns regarding overfitting arising from the small  
348 sample size. Effect modification, e.g. by animal age or sex, was not explored for the same  
349 reason.

350 No effect estimates reached statistical significance, however there were positive trends  
351 across both outcome definitions for bed sharing with humans and the number of SARS-CoV-2  
352 positive humans in the corresponding households, and a negative effect for precautions taken  
353 to prevent SARS-CoV-2 transmission following diagnosis. We also found serostatus was  
354 associated with COVID-19 like illness.

355

356 **[Table 2: Regression model results.** House size was adjusted for house type, but no other  
357 models were not adjusted for confounders due to overfitting concerns. <sup>a</sup>Results available for 51  
358 dogs. <sup>b</sup>House versus apartment or condominium. <sup>c</sup>Animals and humans share eating utensils.  
359 <sup>d</sup>Precautions taken to prevent human-animal SARS-CoV-2 transmission following diagnosis: not  
360 petting or kissing the animal, staying in a different room, and having someone else feed and



361 walk the animal. <sup>e</sup>First exposure defined as 2 days prior to first positive diagnosis in the  
362 household or onset of symptoms, whichever was earlier. POR: prevalence odds ratio; 95% CI:  
363 95% confidence interval.]

364

## 365 **DISCUSSION**

366 We present the results of a cross-sectional, One Health study of dogs and humans sharing  
367 households where at least one human was infected with SARS-CoV-2. The study results indicate  
368 that household transmission of SARS-CoV-2 from humans to animals occurs frequently, and  
369 that these animals commonly display signs of COVID-19 like illness. Notably, in the vast majority  
370 of cases with multiple dogs in a household, all the dogs shared the same serostatus. We  
371 furthermore show that close human-animal contact is common among people and their pets in  
372 this study population, that this contact appears to facilitate SARS-CoV-2 transmission, and that  
373 pet owners in this population are familiar with and willing to adopt measures to protect their  
374 pets from COVID-19.

375         There are several limitations to our approach. First, several weeks had elapsed from first  
376 reported exposure to household sample collection from animals in most households, limiting  
377 our ability to detect viral shedding by PCR testing if nasal shedding is short-lived, but perhaps  
378 strengthening our ability to detect seroconversion. Second, we report here on the findings of  
379 the cross-sectional (baseline) component of our study. Were any pets to test PCR positive, a  
380 longitudinal component would follow. As the outcomes are common, our prevalence odds  
381 ratios do not approximate prevalence ratios. Third, our study is subject to residual confounding  
382 due to inability to adjust for confounders without risking over-fitting, with the exception of

383 house size, which was adjusted for house type. While we believe the confounders examined,  
384 most of which are also exposures of interest, are likely strong risk factors for the outcome, they  
385 are only strong confounders if they also have strong relationships with the exposure of interest.  
386 We do not expect this association to be strong for confounders that do not represent latent  
387 (and therefore difficult to measure and model) constructs, such as socioeconomic status,  
388 strength of the human-animal bond, and level of concern about zoonotic disease transmission.

389         With the exception of PCR testing, mentioned above, we do not expect strong  
390 measurement error in any of the variables examined. As no gold-standard for canine anti-SARS-  
391 CoV-2 serology exists we could not estimate sensitivity of our serological test, however all pre-  
392 COVID-19 samples evaluated were negative, indicating specificity approaches 100%. While our  
393 primary aim—to estimate the burden of human-animal SARS-CoV-2 transmission—was  
394 estimated with reasonable precision, as we were not able to estimate sensitivity of our  
395 serological test, we could not propagate uncertainty arising from imperfect sensitivity in our  
396 prevalence estimates. Furthermore, due to our small sample size variance was high for our  
397 estimated prevalence odds ratios. Finally, by nature of our recruitment methods and study  
398 population, generalizability of our findings is likely limited to highly-educated, higher-income  
399 individuals residing in urban and suburban communities.

400

## 401 **CONCLUSIONS**

402 These limitations aside, our study contributes important and novel findings to the literature on  
403 cross-species transmission of SARS-CoV-2, with relevance to other zoonoses and  
404 anthroozoonoses transmitted in a household setting. Furthermore, we collected human,

405 animal, and environmental data, representing a true One Health approach to this critical  
406 research question. Finally, our findings indicate households in this population are willing to  
407 adopt measures to protect their pets from SARS-CoV-2 infection, and that these measures may  
408 be effective, indicating an opportunity to prevent household transmission of zoonoses and  
409 anthroozoonoses through health education and policy. As vaccine roll-out continues and  
410 human-to-human transmission wanes, and in preparation for the next pandemic of zoonotic  
411 origin, rigorous characterization of the nature of human-animal contact within households, and  
412 the implications of this contact for disease transmission, is critical.

413

#### 414 **ACKNOWLEDGEMENTS**

415 Data collection: Jessica Bell, DVM and Raelynn Farnsworth, DVM, Washington State University  
416 College of Veterinary Medicine; Katherine Burr, DVM and Gemina Garland Lewis, MS, Center for  
417 One Health Research, University of Washington.

418 Survey Review: J. Scott Weese, Ontario Veterinary College, University of Guelph.

419 Recombinant SARS-CoV-2 receptor binding domain source material: Dr. Wes Van Voorhis,  
420 Center for Emerging and Re-emerging Infectious Diseases, University of Washington, Seattle,  
421 WA, USA [16,17].

422

#### 423 **FUNDING**

424 This work was supported by the Wild Lives Foundation; the National Institute of Allergy and  
425 Infectious Diseases/National Institutes of Health and the United World Antiviral Research  
426 Network (UWARN) in a administrative supplement (Grant #A158474); a gift from the American

427 Endowment Foundation (AEF); and the Department of Health and Human Services, Food and  
428 Drug Administration, Research Demonstration Cooperative Agreement (Grant#  
429 5U18FD006180). These funders had no role in study design; data collection, analysis, or  
430 interpretation; writing of the report; or decision to submit for publication.

431

#### 432 **DATA STATEMENT**

433 De-identified data and code will be made available in a GitHub repository prior to publication.

434

#### 435 **DECLARATIONS OF INTEREST**

436 None.

437

#### 438 **AUTHOR CONTRIBUTIONS**

439 J Meisner: conceptualization, data curation, formal analysis, methodology, software,  
440 visualization, writing – original draft, writing – review & editing. T Baszler: conceptualization,  
441 formal analysis, funding acquisition, methodology, project administration, resources, writing –  
442 original draft, writing – review & editing. K Kuehl: conceptualization, data curation, writing –  
443 original draft, writing – review & editing. V Ramirez: conceptualization, data curation, formal  
444 analysis, funding acquisition, project administration, resources, software, supervision, writing –  
445 review & editing. A Baines: data curation, formal analysis, software, writing – review & editing.  
446 L Frisbie: data curation, formal analysis, software, writing – review & editing. E Lofgren:  
447 conceptualization, formal analysis, methodology, writing – review & editing. D DeAvila: formal  
448 analysis, methodology, validation. R Wolking: formal analysis, methodology, validation. D

449 Bradway: formal analysis, methodology, validation. P Rabinowitz: conceptualization, data  
450 curation, formal analysis, funding acquisition, methodology, project administration, resources,  
451 supervision, writing – original draft, writing – review & editing.  
452

453 **REFERENCES**

- 454 [1] M. Konda, B. Dodda, V.M. Konala, S. Naramala, S. Adapa, Potential Zoonotic Origins of  
455 SARS-CoV-2 and Insights for Preventing Future Pandemics Through One Health Approach,  
456 *Cureus*. (2020). <https://doi.org/10.7759/cureus.8932>.
- 457 [2] R.J. Molenaar, S. Vreman, R.W. Hakze-van der Honing, R. Zwart, J. de Rond, E.  
458 Weesendorp, L.A.M. Smit, M. Koopmans, R. Bouwstra, A. Stegeman, W.H.M. van der  
459 Poel, Clinical and Pathological Findings in SARS-CoV-2 Disease Outbreaks in Farmed Mink  
460 (*Neovison vison*), *Vet. Pathol.* (2020). <https://doi.org/10.1177/0300985820943535>.
- 461 [3] B.E.E. Martina, B.L. Haagmans, T. Kuiken, R.A.M. Fouchier, G.F. Rimmelzwaan, G. Van  
462 Amerongen, J.S.M. Peiris, W. Lim, A.D.M.E. Osterhaus, SARS virus infection of cats and  
463 ferrets, *Nature*. (2003). <https://doi.org/10.1038/425915a>.
- 464 [4] American Veterinary Medical Association, SARS-CoV-2 in Animals, (n.d.).  
465 [www.avma.org/resources-tools/animal-health-and-welfare/covid-19/sars-cov-2-animals-](http://www.avma.org/resources-tools/animal-health-and-welfare/covid-19/sars-cov-2-animals-including-pets)  
466 [including-pets](http://www.avma.org/resources-tools/animal-health-and-welfare/covid-19/sars-cov-2-animals-including-pets).
- 467 [5] P. F, SARS-CoV-2 variants lacking ORF8 occurred in farmed mink and pangolin, *Gene*. 784  
468 (2021) 145596. <https://doi.org/10.1016/j.gene.2021.145596>.
- 469 [6] S. Guo, K. Liu, J. Zheng, The Genetic Variant of SARS-CoV-2: Would it matter for  
470 Controlling the Devastating Pandemic?, *Int. J. Biol. Sci.* (2021).  
471 <https://doi.org/10.7150/ijbs.59137>.
- 472 [7] M.F. Davis, S.C. Rankin, J.M. Schurer, S. Cole, L. Conti, P. Rabinowitz, G. Gray, L. Kahn, C.  
473 Machalaba, J. Mazet, M. Pappaioanou, J. Sargeant, A. Thompson, S. Weese, J. Zinnstag,  
474 Checklist for One Health Epidemiological Reporting of Evidence (COHERE), *One Heal.*

- 475 (2017). <https://doi.org/10.1016/j.onehlt.2017.07.001>.
- 476 [8] STROBE statement - Checklist of items that should be included in reports of  
477 observational studies (© STROBE Initiative), *Int. J. Public Health*. (2008).  
478 <https://doi.org/10.1007/s00038-007-0239-9>.
- 479 [9] M. Imai, K. Iwatsuki-Horimoto, M. Hatta, S. Loeber, P.J. Halfmann, N. Nakajima, T.  
480 Watanabe, M. Ujie, K. Takahashi, M. Ito, S. Yamada, S. Fan, S. Chiba, M. Kuroda, L. Guan,  
481 K. Takada, T. Armbrust, A. Balogh, Y. Furusawa, M. Okuda, H. Ueki, A. Yasuhara, Y. Sakai-  
482 Tagawa, T.J.S. Lopes, M. Kiso, S. Yamayoshi, N. Kinoshita, N. Ohmagari, S.I. Hattori, M.  
483 Takeda, H. Mitsuya, F. Krammer, T. Suzuki, Y. Kawaoka, Syrian hamsters as a small animal  
484 model for SARS-CoV-2 infection and countermeasure development, *Proc. Natl. Acad. Sci.*  
485 *U. S. A.* (2020). <https://doi.org/10.1073/pnas.2009799117>.
- 486 [10] J. Shi, Z. Wen, G. Zhong, H. Yang, C. Wang, B. Huang, R. Liu, X. He, L. Shuai, Z. Sun, Y.  
487 Zhao, P. Liu, L. Liang, P. Cui, J. Wang, X. Zhang, Y. Guan, W. Tan, G. Wu, H. Chen, Z. Bu, Z.  
488 Bu, Susceptibility of ferrets, cats, dogs, and other domesticated animals to SARS-  
489 coronavirus 2, *Science* (80-. ). (2020). <https://doi.org/10.1126/science.abb7015>.
- 490 [11] P.A. Harris, R. Taylor, B.L. Minor, V. Elliott, M. Fernandez, L. O'Neal, L. McLeod, G.  
491 Delacqua, F. Delacqua, J. Kirby, S.N. Duda, The REDCap consortium: Building an  
492 international community of software platform partners, *J. Biomed. Inform.* (2019).  
493 <https://doi.org/10.1016/j.jbi.2019.103208>.
- 494 [12] V.M. Corman, O. Landt, M. Kaiser, R. Molenkamp, A. Meijer, D.K.W. Chu, T. Bleicker, S.  
495 Brünink, J. Schneider, M.L. Schmidt, D.G.J.C. Mulders, B.L. Haagmans, B. Van Der Veer, S.  
496 Van Den Brink, L. Wijsman, G. Goderski, J.L. Romette, J. Ellis, M. Zambon, M. Peiris, H.

- 497 Goossens, C. Reusken, M.P.G. Koopmans, C. Drosten, Detection of 2019 novel  
498 coronavirus (2019-nCoV) by real-time RT-PCR, *Eurosurveillance*. (2020).  
499 <https://doi.org/10.2807/1560-7917.ES.2020.25.3.2000045>.
- 500 [13] R.F. for S. Computing., R Core Team 2020, R A Lang. *Environ. Stat. Comput.* (2020).
- 501 [14] J. Textor, B. van der Zander, M.S. Gilthorpe, M. Liškiewicz, G.T. Ellison, Robust causal  
502 inference using directed acyclic graphs: The R package “dagitty,” *Int. J. Epidemiol.* (2016).  
503 <https://doi.org/10.1093/ije/dyw341>.
- 504 [15] S. Højsgaard, U. Halekoh, J. Yan, The R Package geepack for Generalized Estimating  
505 Equations *Journal of Statistical Software, CRAN.* (2006).
- 506 [16] A.C. Walls, Y.J. Park, M.A. Tortorici, A. Wall, A.T. McGuire, D. Veessler, Structure, Function,  
507 and Antigenicity of the SARS-CoV-2 Spike Glycoprotein, *Cell.* (2020).  
508 <https://doi.org/10.1016/j.cell.2020.02.058>.
- 509 [17] I.Q. Phan, S. Subramanian, D. Kim, M. Murphy, D. Pettie, L. Carter, I. Anishchenko, L.K.  
510 Barrett, J. Craig, L. Tillery, R. Shek, W.E. Harrington, D.M. Koelle, A. Wald, D. Veessler, N.  
511 King, J. Boonyaratanakornkit, N. Isoherranen, A.L. Greninger, K.R. Jerome, H. Chu, B.  
512 Staker, L. Stewart, P.J. Myler, W.C. Van Voorhis, In silico detection of SARS-CoV-2 specific  
513 B-cell epitopes and validation in ELISA for serological diagnosis of COVID-19, *Sci. Rep.*  
514 (2021). <https://doi.org/10.1038/s41598-021-83730-y>.  
515



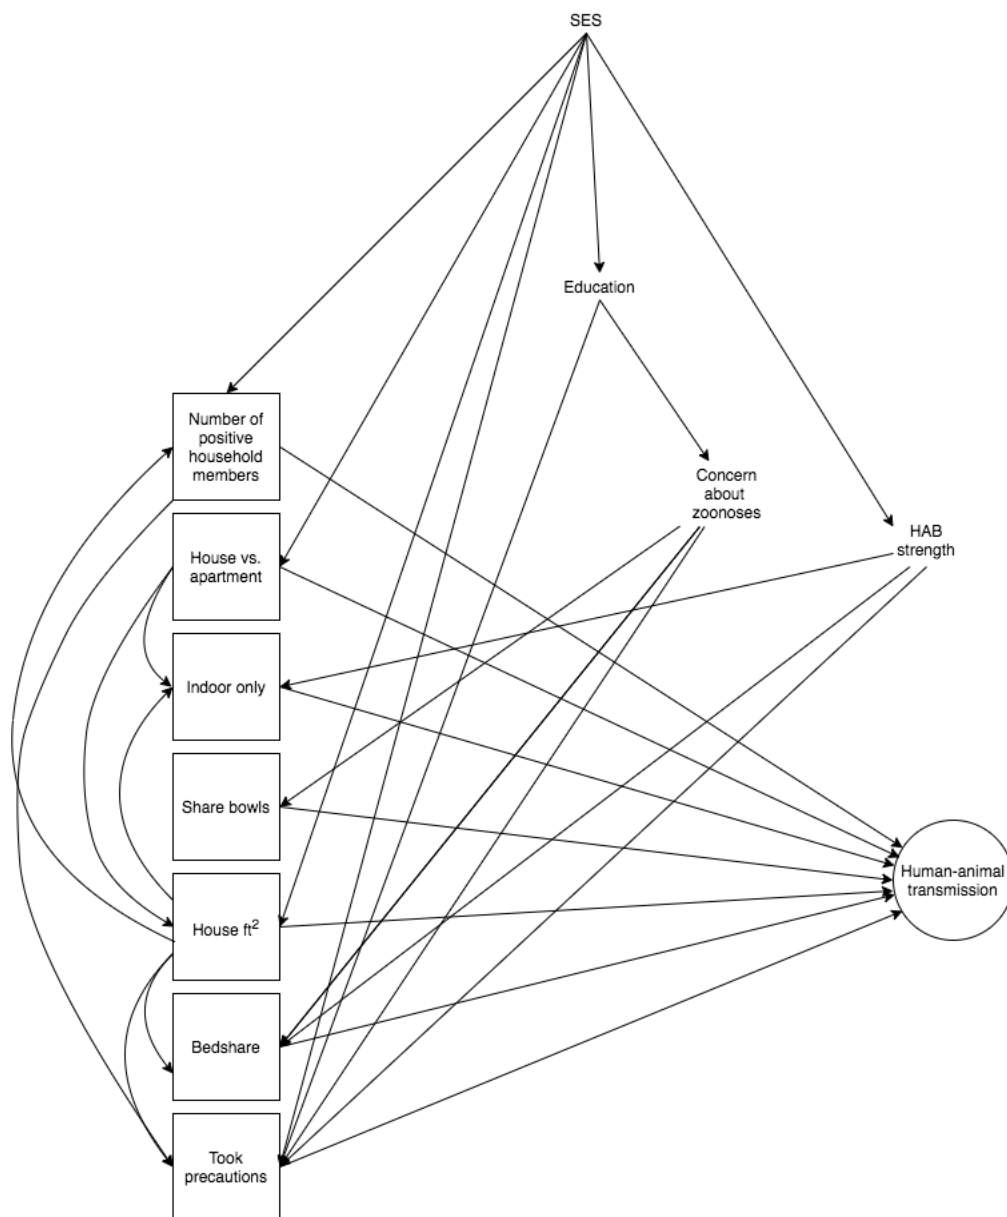

**Figure 1: Directed acyclic graph for human-animal SARS CoV2 transmission.** Variables outlined with a square are the exposures of interest, while outcome (approximated by serostatus, PCR result, and COVID-19 like illness in separate models) is outlined with a circle. HAB: human-animal bond; SES: socioeconomic status; took precautions: SARS-CoV-2 positive household member(s) took precautions to prevent transmission to pet; indoor-only: animal does not go outdoors; bedshare: animal shares a bed with one or more household members.

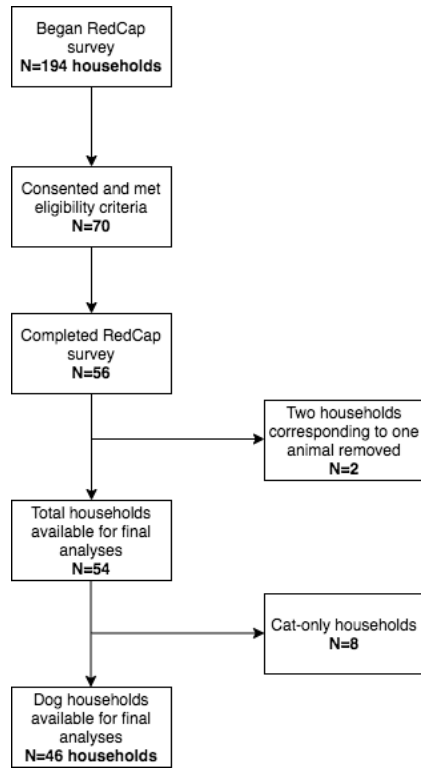

**Figure 2: Flowchart depicting study recruitment.** Two households were removed at the final step as the corresponding dog was moved, immediately after onset of the resident's illness, from the household of residence to a family member's household.

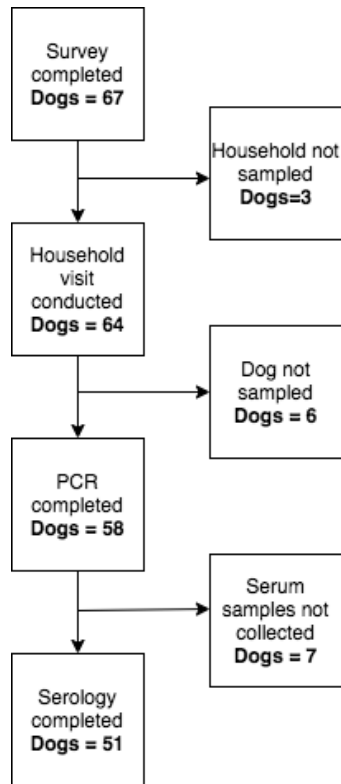

**Figure 3: Flowchart depicting serological and PCR sampling.** Out of 67 dogs corresponding to 5 households with completed surveys, PCR testing is complete for 58 dogs, and serological testing is complete for 51 dogs. The remaining dogs were not sampled due to safety concerns.

|                                                                 | n (%)          |
|-----------------------------------------------------------------|----------------|
| <i>Animal</i>                                                   |                |
| Seropositive                                                    | 22 (43%)       |
| COVID-19 like illness                                           | 14 (24%)       |
| Activity <sup>a</sup> during quarantine                         | 20 (31%)       |
| Took precautions <sup>b</sup>                                   | 33 (51%)       |
| Age                                                             | 6.74 (3.85)*   |
| Male                                                            | 36 (55%)       |
| Respondent aware of CDC guidelines <sup>c</sup>                 | 42 (63%)       |
| Time from first diagnosis <sup>d</sup> to sampling (days)       | 43.06 (33.37)* |
| Time from last diagnosis <sup>d</sup> to sampling (days)        | 37.92 (40.9)*  |
| <i>Human</i>                                                    |                |
| Index case age                                                  | 42.06 (13.6)*  |
| Index case male                                                 | 19 (28%)       |
| Index case preexisting condition <sup>e</sup>                   | 19 (28%)       |
| Index case was hospitalized                                     | 1 (1%)         |
| Number of SARS-CoV-2 positive household members                 | 1.72 (1.28)*   |
| Number of household members with COVID-19 symptoms <sup>f</sup> | 0.31 (0.72)*   |
| Number of household residents                                   | 3.4 (1.54)*    |
| <i>Environment</i>                                              |                |
| Reside in a house                                               | 53 (79%)       |

|                                                   |              |
|---------------------------------------------------|--------------|
| Reside in an apartment or condominium             | 30 (21%)     |
| Square footage of housing                         | 1901 (974)*  |
| Number of bedrooms                                | 3.34 (1.46)* |
| Number of floors                                  | 1.82 (0.67)* |
| Access to outdoor space where pets can roam       | 57 (85%)     |
| <hr/> <i>Human-animal contact</i> <hr/>           |              |
| Animal eating utensils cleaned in the kitchen     | 63 (95%)     |
| Humans and animals share eating utensils          | 9 (13%)      |
| Humans wash hands before handling animals         | 8 (12%)      |
| Humans wash hands after handling animals          | 23 (34%)     |
| Animal bedshares with humans                      | 47 (72%)     |
| Animal shares a bedroom but not a bed with humans | 22 (34%)     |
| Animal goes indoors and outdoors                  | 26 (40%)     |
| Animal sleeps outdoors                            | 0 (0%)       |
| Humans pet the animal                             | 65 (100%)    |
| Humans kiss the animal                            | 45 (69%)     |
| Animal is allowed on furniture                    | 58 (89%)     |

**Table 1: Descriptive statistics for 67 dogs corresponding to 46 households.** \*mean (standard deviation). <sup>a</sup>Activity defined as going to a veterinary clinic or groomer, being walked off-leash, or visiting an off-leash park, dog park, kennel, or daycare facility. <sup>b</sup>Precautions to prevent human-animal SARS-CoV-2 transmission following diagnosis: not petting or kissing the animal, staying in a different room, and having someone else feed and walk the animal. <sup>c</sup>Guidelines to

prevent human-animal SARS-CoV-2 transmission. <sup>d</sup>First diagnosis: earliest SARS-CoV-2 diagnosis

in the household; final diagnosis: last SARS-CoV-2 diagnosis in the household. <sup>e</sup>Preexisting

conditions: diabetes, kidney disease, heart disease, hypertension, immunosuppression.

<sup>f</sup>Household members who had COVID-19 symptoms but did not get tested.

| Exposure                                      | COVID-19 like illness | Seropositive <sup>a</sup> |
|-----------------------------------------------|-----------------------|---------------------------|
|                                               | POR (95% CI)          |                           |
| Indoor-only                                   | 1.41 (0.41, 4.83)     | 0.7 (0.2, 2.4)            |
| House type <sup>b</sup>                       | 0.42 (0.12, 1.45)     | 1.92 (0.56, 6.59)         |
| House square footage                          | 1 (0.29, 3.43)        | 1 (0.29, 3.44)            |
| Share eating utensils <sup>c</sup>            | 0.91 (0.27, 3.14)     | 2.08 (0.61, 7.16)         |
| Bedsharing                                    | 2.82 (0.82, 9.68)     | 1.91 (0.56, 6.55)         |
| Took precautions <sup>d</sup>                 | 0.95 (0.28, 3.27)     | 0.38 (0.11, 1.3)          |
| # SARS-CoV-2 infected humans                  | 1.2 (0.35, 4.13)      | 1.11 (0.32, 3.83)         |
| Canine COVID-19 like illness                  | -                     | 1.89 (0.48, 7.37)         |
| Time since first exposure (days) <sup>e</sup> | -                     | 1.00 (0.98, 1.02)         |

**Table 2: Regression model results.** House size was adjusted for house type, but no other

models were not adjusted for confounders due to overfitting concerns. <sup>a</sup>Results available for 51

dogs. <sup>b</sup>House versus apartment or condominium. <sup>c</sup>Animals and humans share eating utensils.

<sup>d</sup>Precautions taken to prevent human-animal SARS-CoV-2 transmission following diagnosis: not petting or kissing the animal, staying in a different room, and having someone else feed and walk the animal. <sup>e</sup>First exposure defined as 2 days prior to first positive diagnosis in the household or onset of symptoms, whichever was earlier. POR: prevalence odds ratio; 95% CI:

95% confidence interval.
